# Supplementary material
Source: PubMed Central journal article supplement (PMC9043038)
Supplement: NIHMS1779567-supplement-Supplemental_Figure_1.pdf [file NIHMS1779567-supplement-Supplemental_Figure_1.pdf]

### Non-suicidal Self-Injury

$F_{\text{Fisher}}(3.38, 3307.12) = 483.88, p = 1.07e-287, \hat{\omega}_p^2 = 0.23, CI_{95\%} [0.16, 0.25], n_{\text{pairs}} = 978$

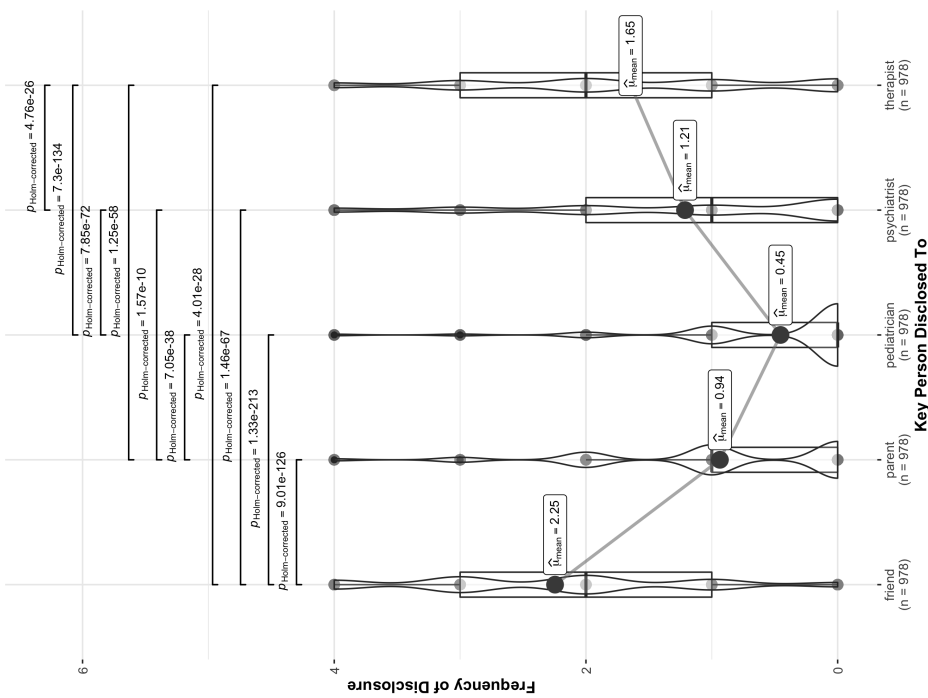

Pairwise test: Student's t-test. Comparisons shown: only significant

### Suicide Ideation

$F_{\text{Fisher}}(3.33, 3302.29) = 434.83, p = 9.46e-260, \hat{\omega}_p^2 = 0.20, CI_{95\%} [0.14, 0.23], n_{\text{pairs}} = 892$

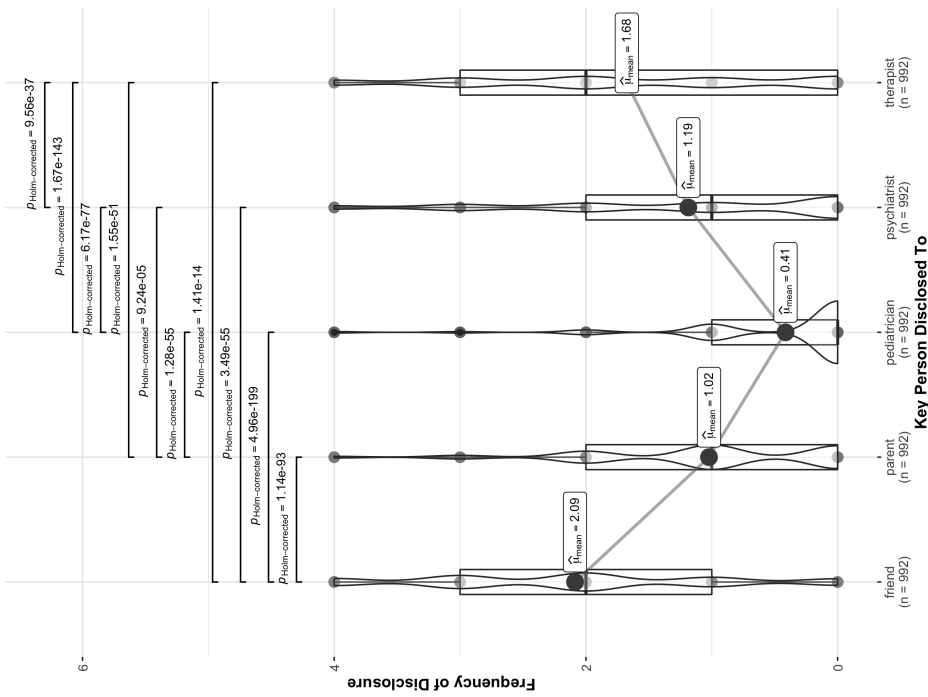

Pairwise test: Student's t-test. Comparisons shown: only significant

### Suicide Attempt

$F_{\text{Fisher}}(3.39, 1833.48) = 184.45, p = 7.66e-116, \hat{\omega}_p^2 = 0.13, CI_{95\%} [0.11, 0.16], n_{\text{pairs}} = 542$

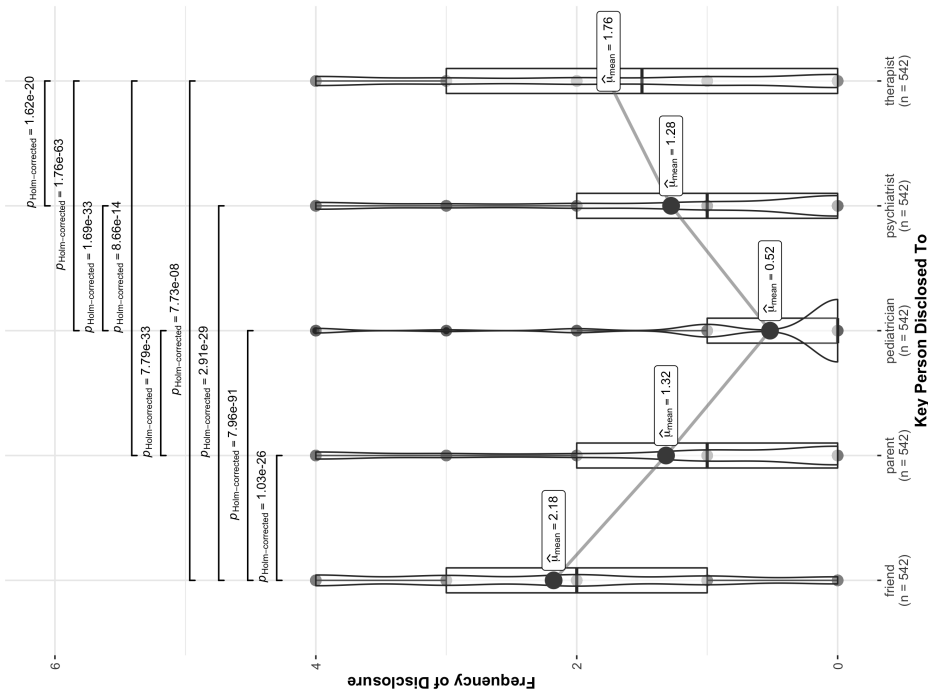

Pairwise test: Student's t-test. Comparisons shown: only significant
