# Supplementary material
Source: PubMed Central journal article supplement (PMC9043038)
Supplement: NIHMS1779567-supplement-Supplemental_Figure_2.pdf [file NIHMS1779567-supplement-Supplemental_Figure_2.pdf]

$\chi^2_{McNemar}(1) = 135.31, p = 2.82e-31, \hat{g}_{Cohen} = 0.44, CI_{95\%} [0.40, 0.47], n_{pairs} = 521$

$\chi^2_{McNemar}(1) = 96.38, p = 9.5e-23, \hat{g}_{Cohen} = 0.38, CI_{95\%} [0.32, 0.42], n_{pairs} = 941$

$\chi^2_{McNemar}(1) = 135.31, p = 2.82e-31, \hat{g}_{Cohen} = 0.44, CI_{95\%} [0.40, 0.47], n_{pairs} = 521$

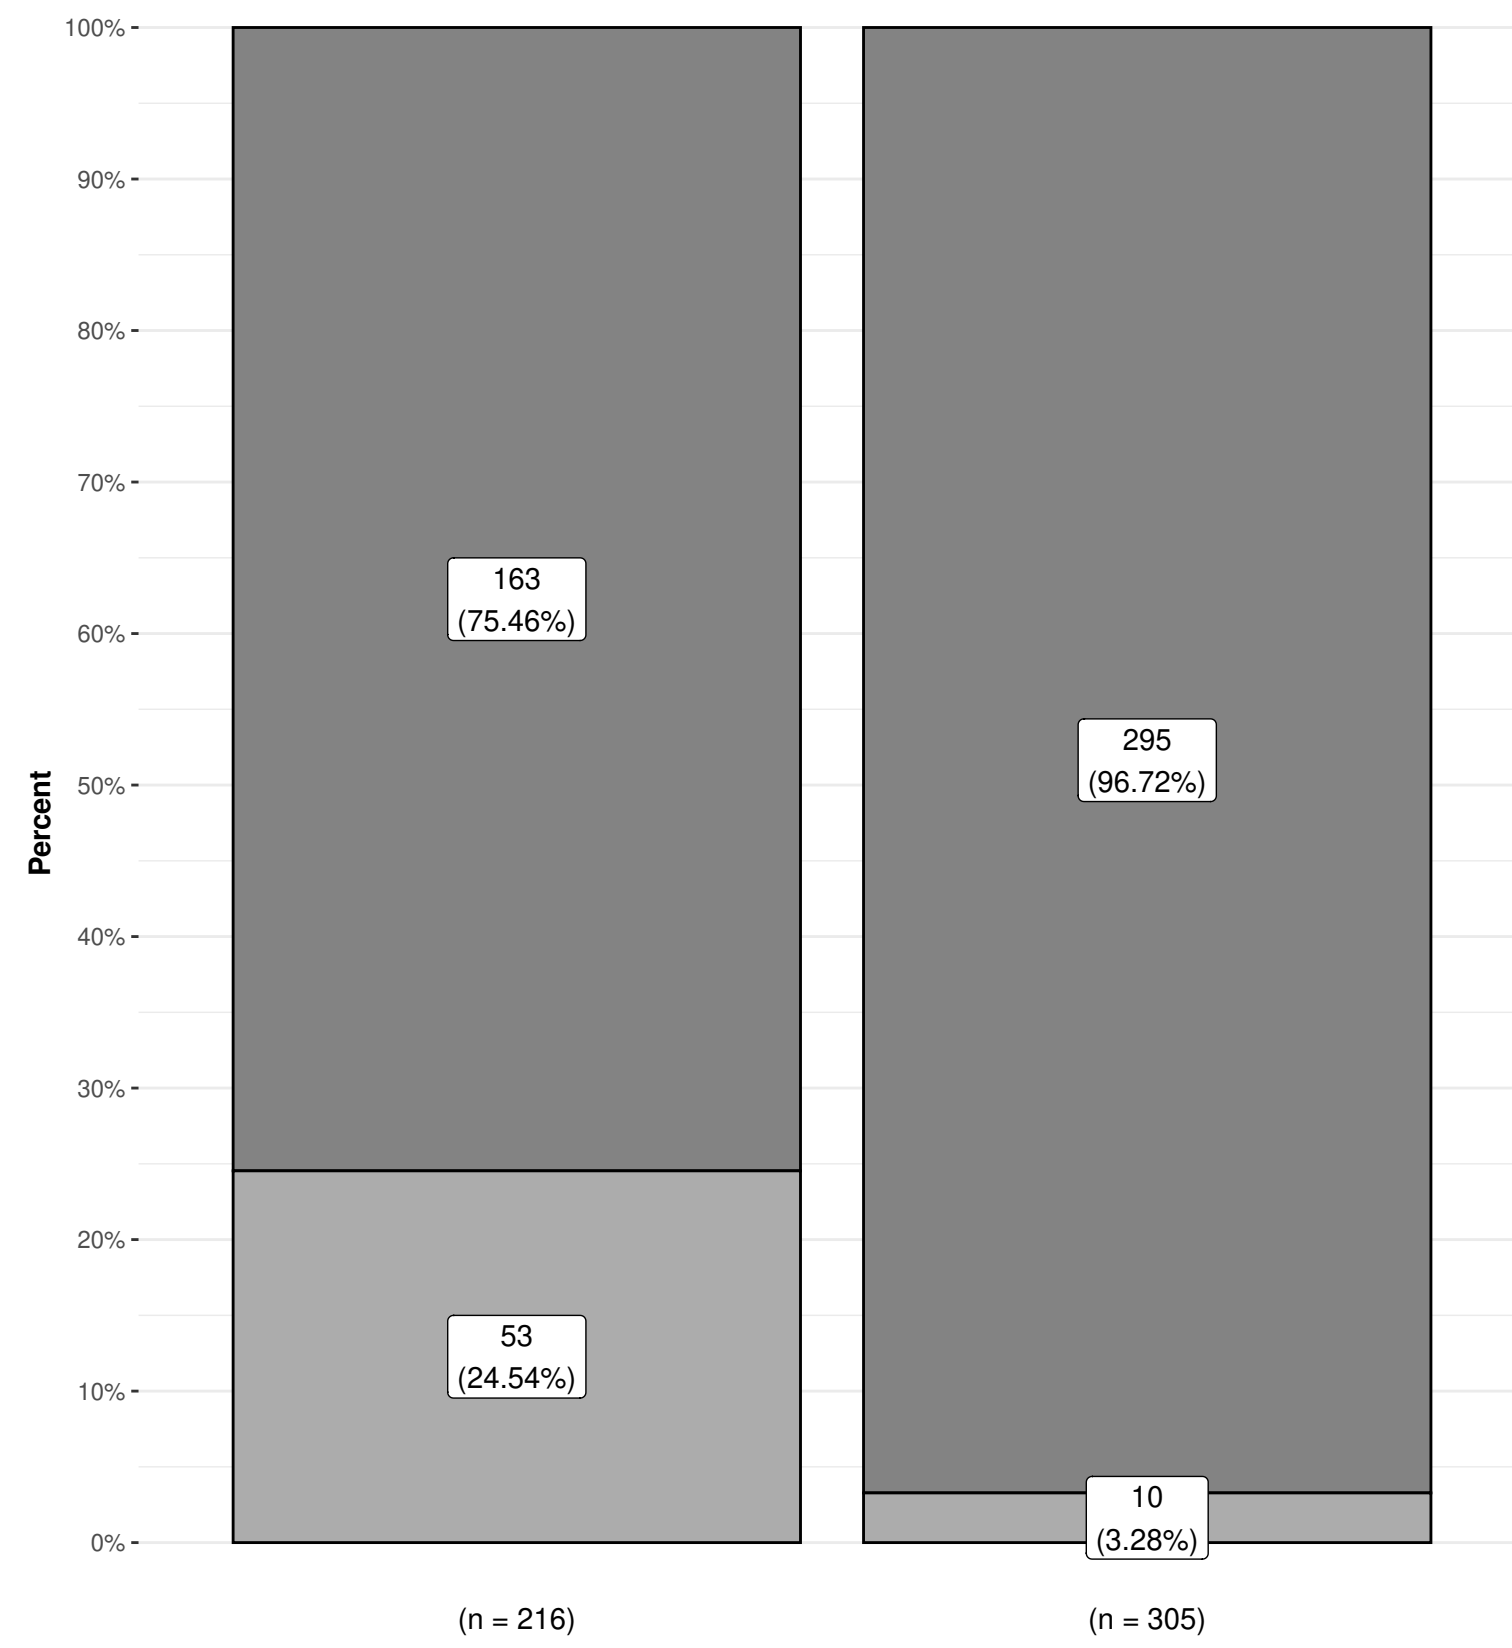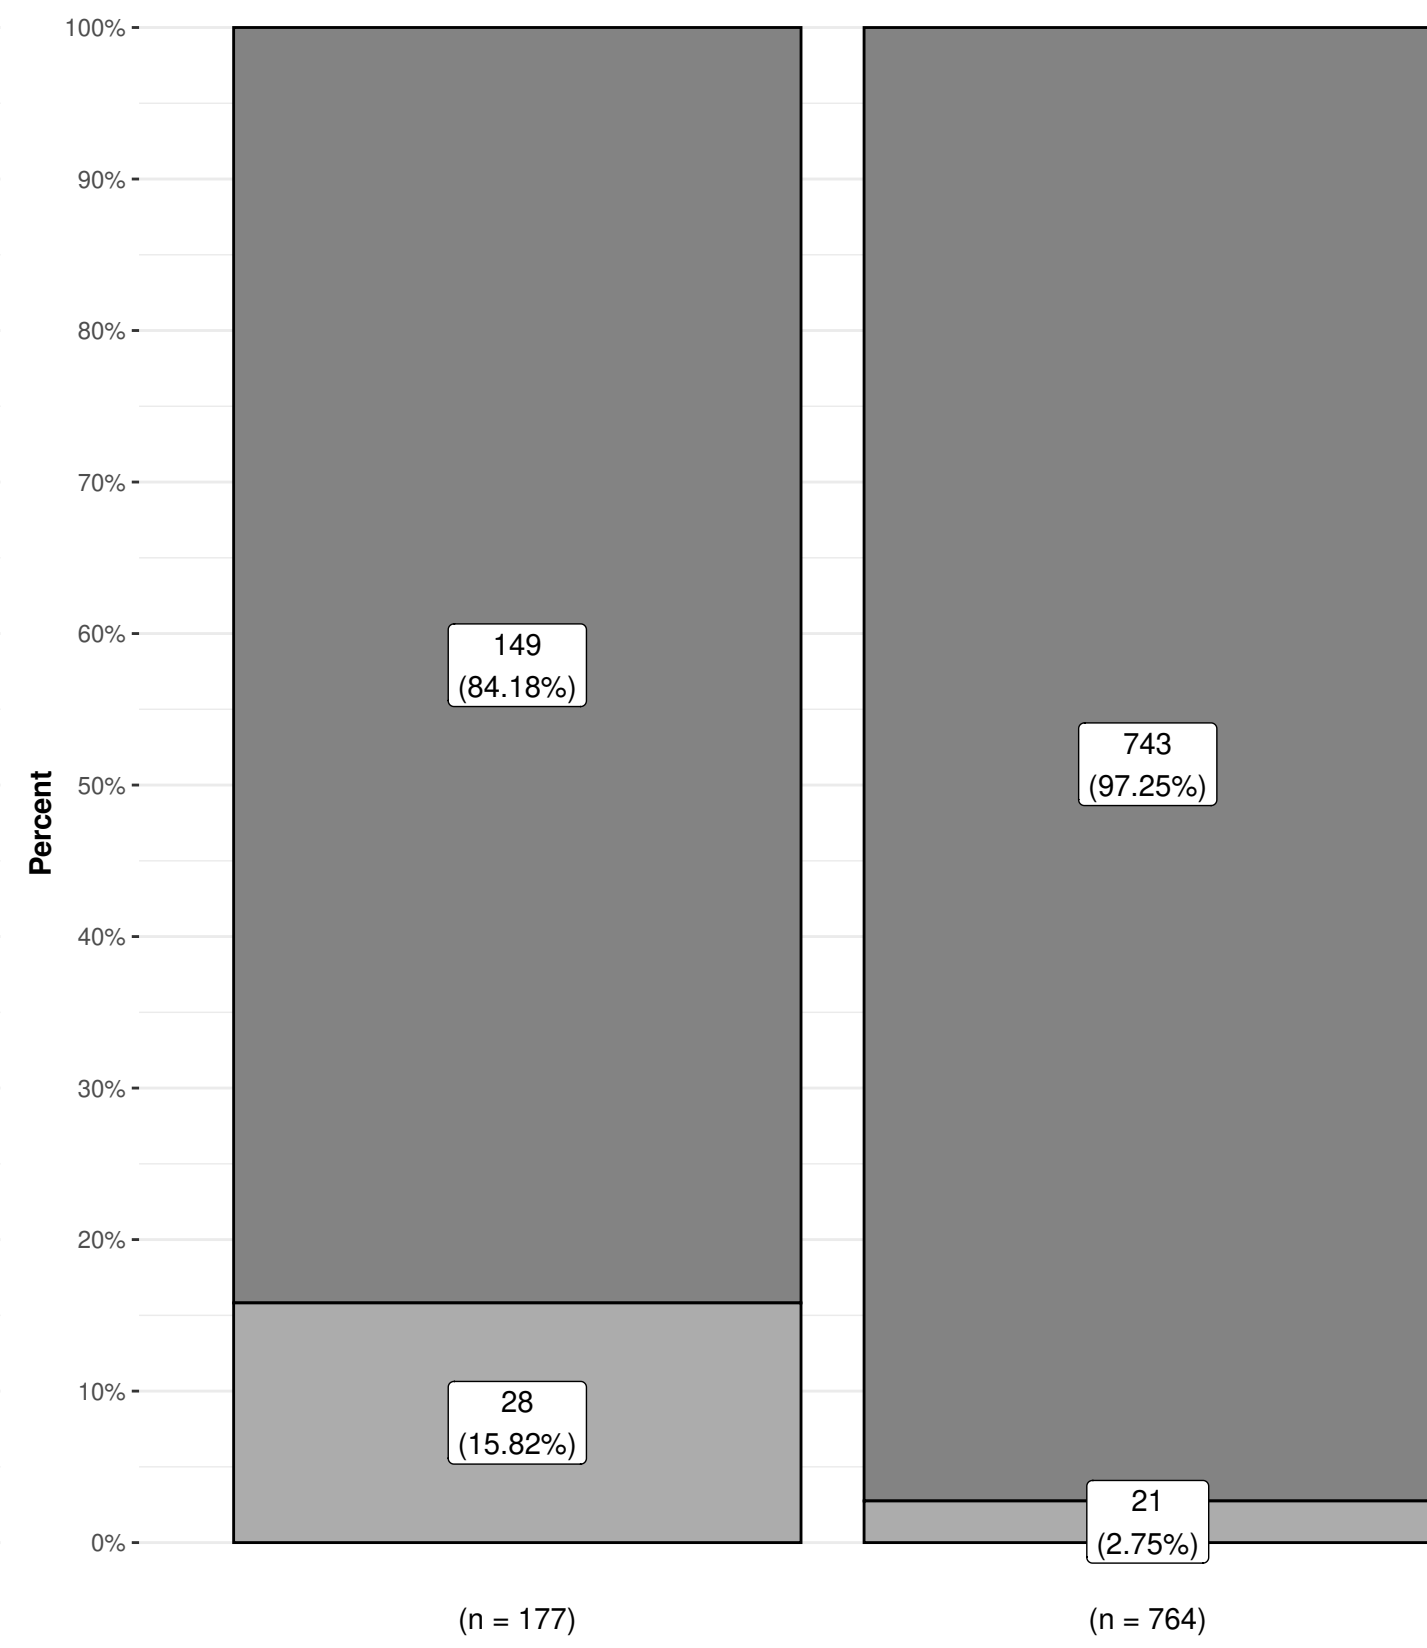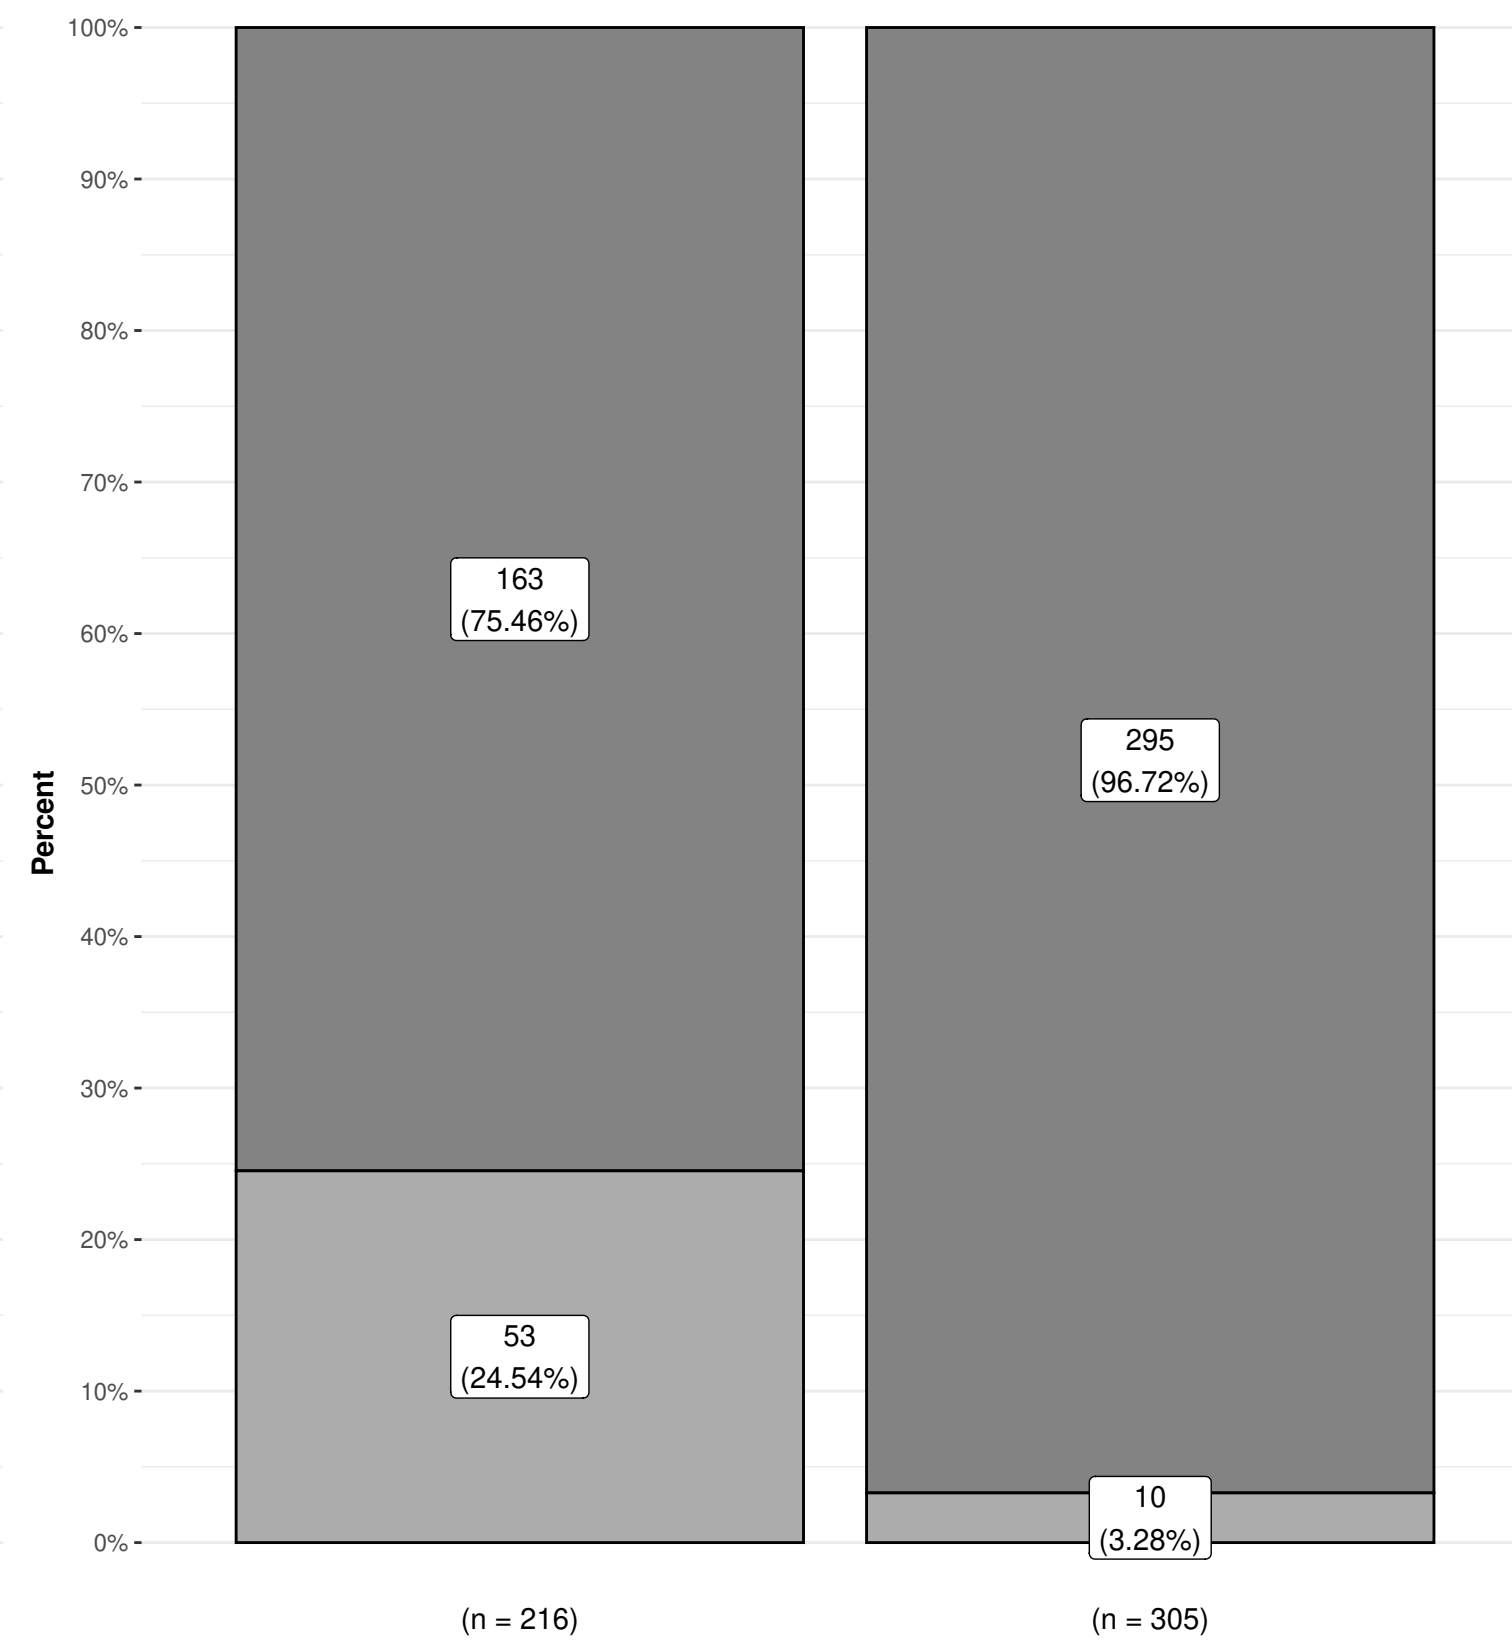

**Mental Health Provider Assessment of Nonsuicidal Self-Injury**

**Mental Health Provider Assessment of Suicide Ideation**

**Therapist Assessment of Suicide Attempts**

Disclosure  
1  
0

$\chi^2_{McNemar}(1) = 9.22, p = 0.002, \hat{g}_{Cohen} = 0.12, CI_{95\%} [0.04, 0.19], n_{pairs} = 618$

$\chi^2_{McNemar}(1) = 50.20, p = 1.39e-12, \hat{g}_{Cohen} = 0.27, CI_{95\%} [0.20, 0.32], n_{pairs} = 641$

$\chi^2_{McNemar}(1) = 29.55, p = 5.46e-08, \hat{g}_{Cohen} = 0.23, CI_{95\%} [0.15, 0.29], n_{pairs} = 372$

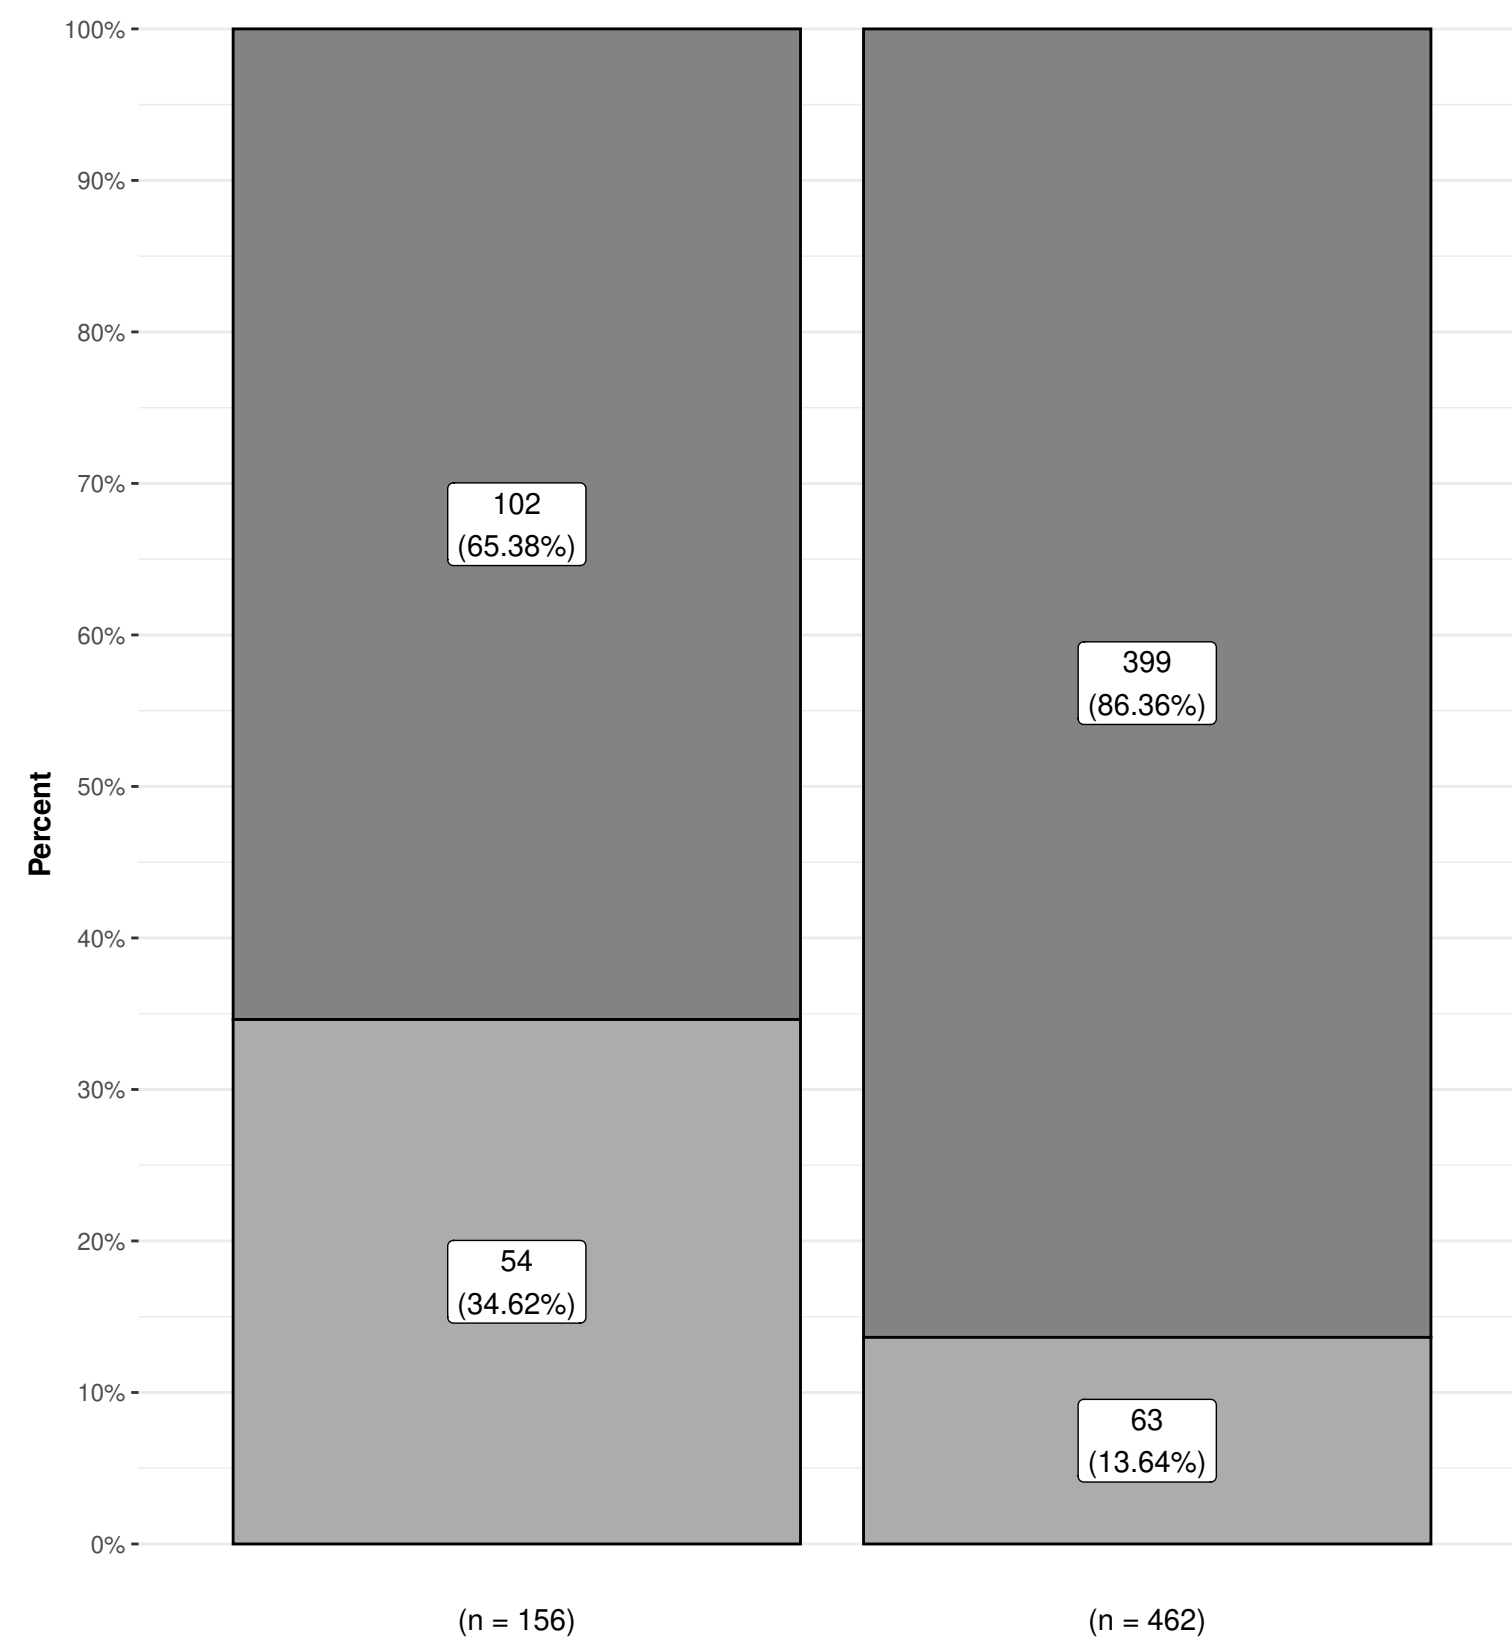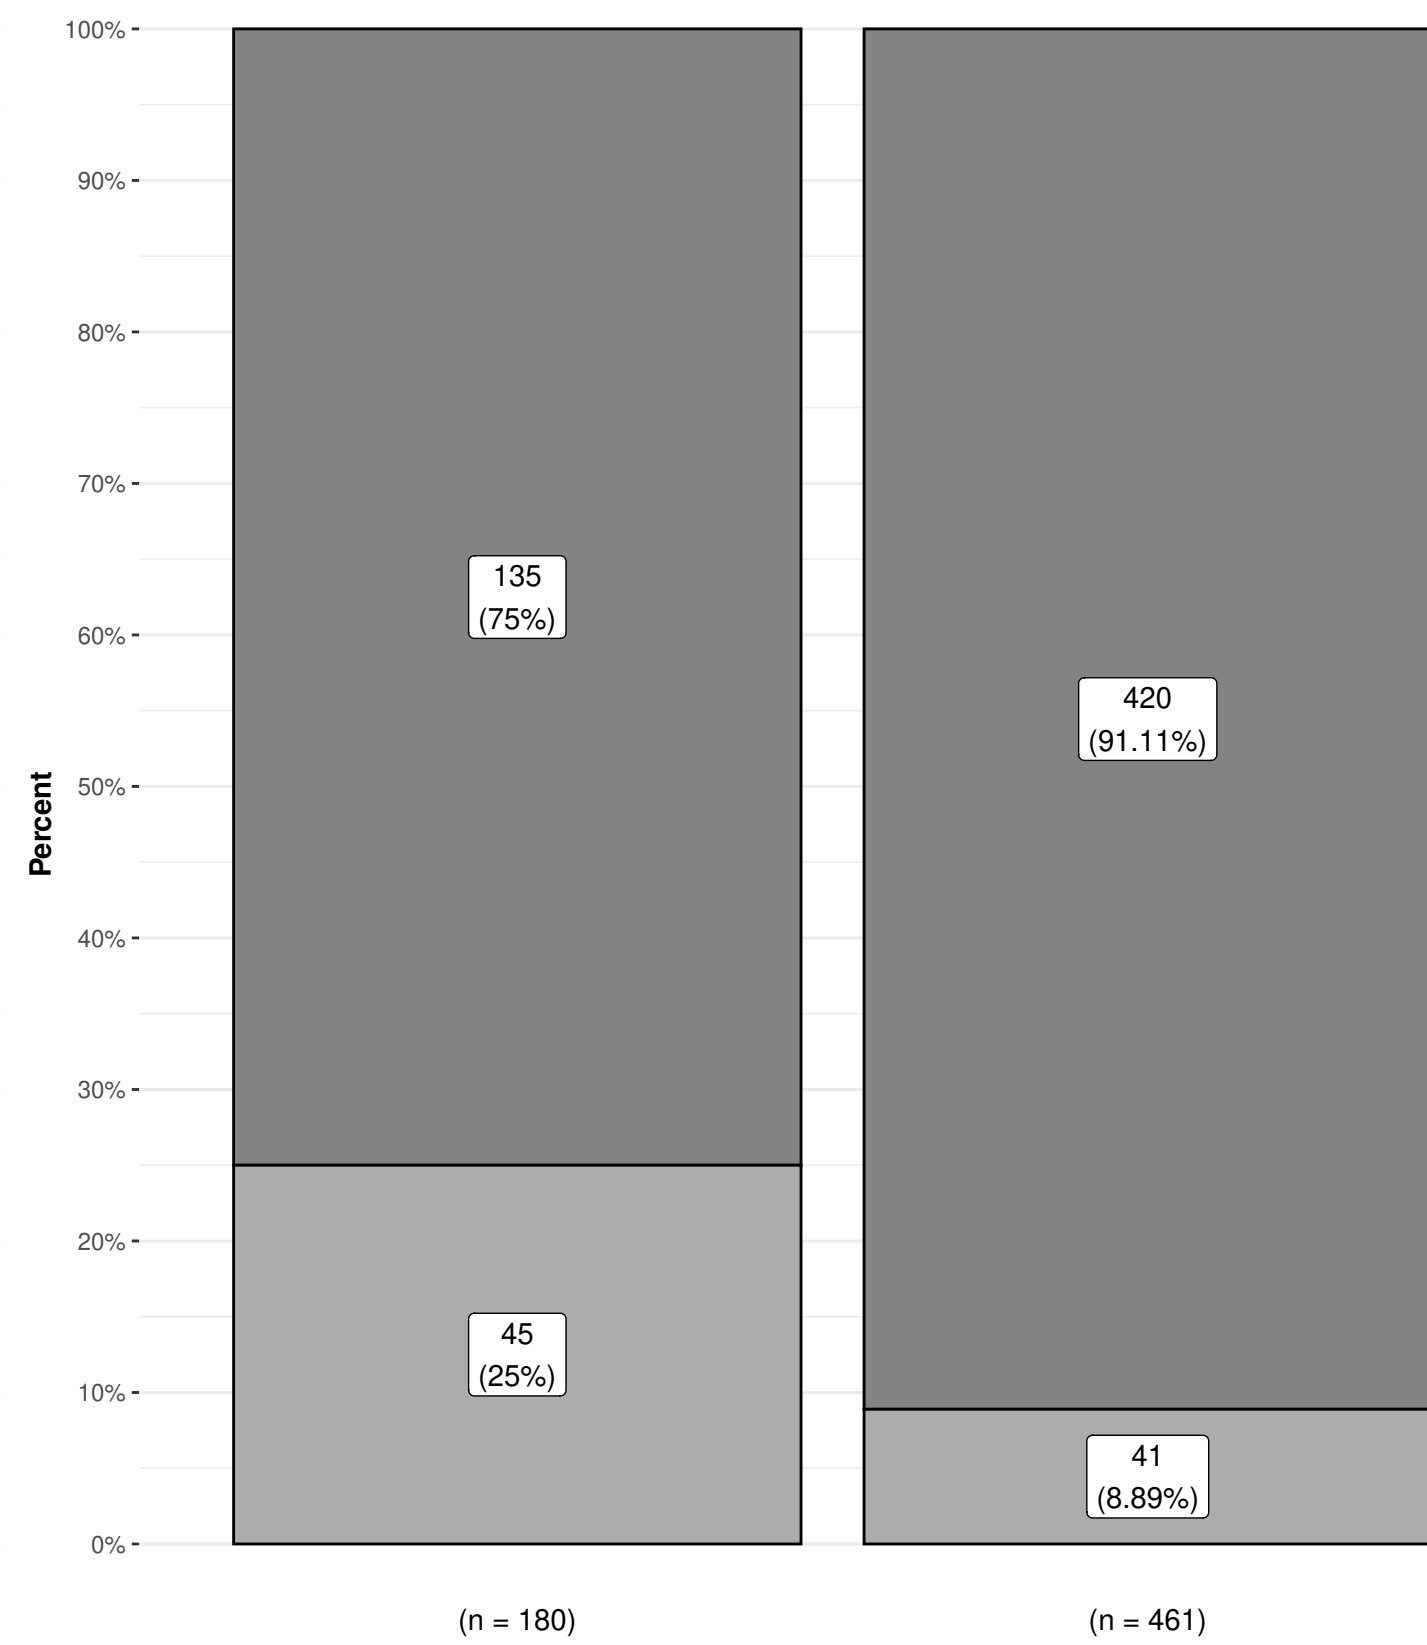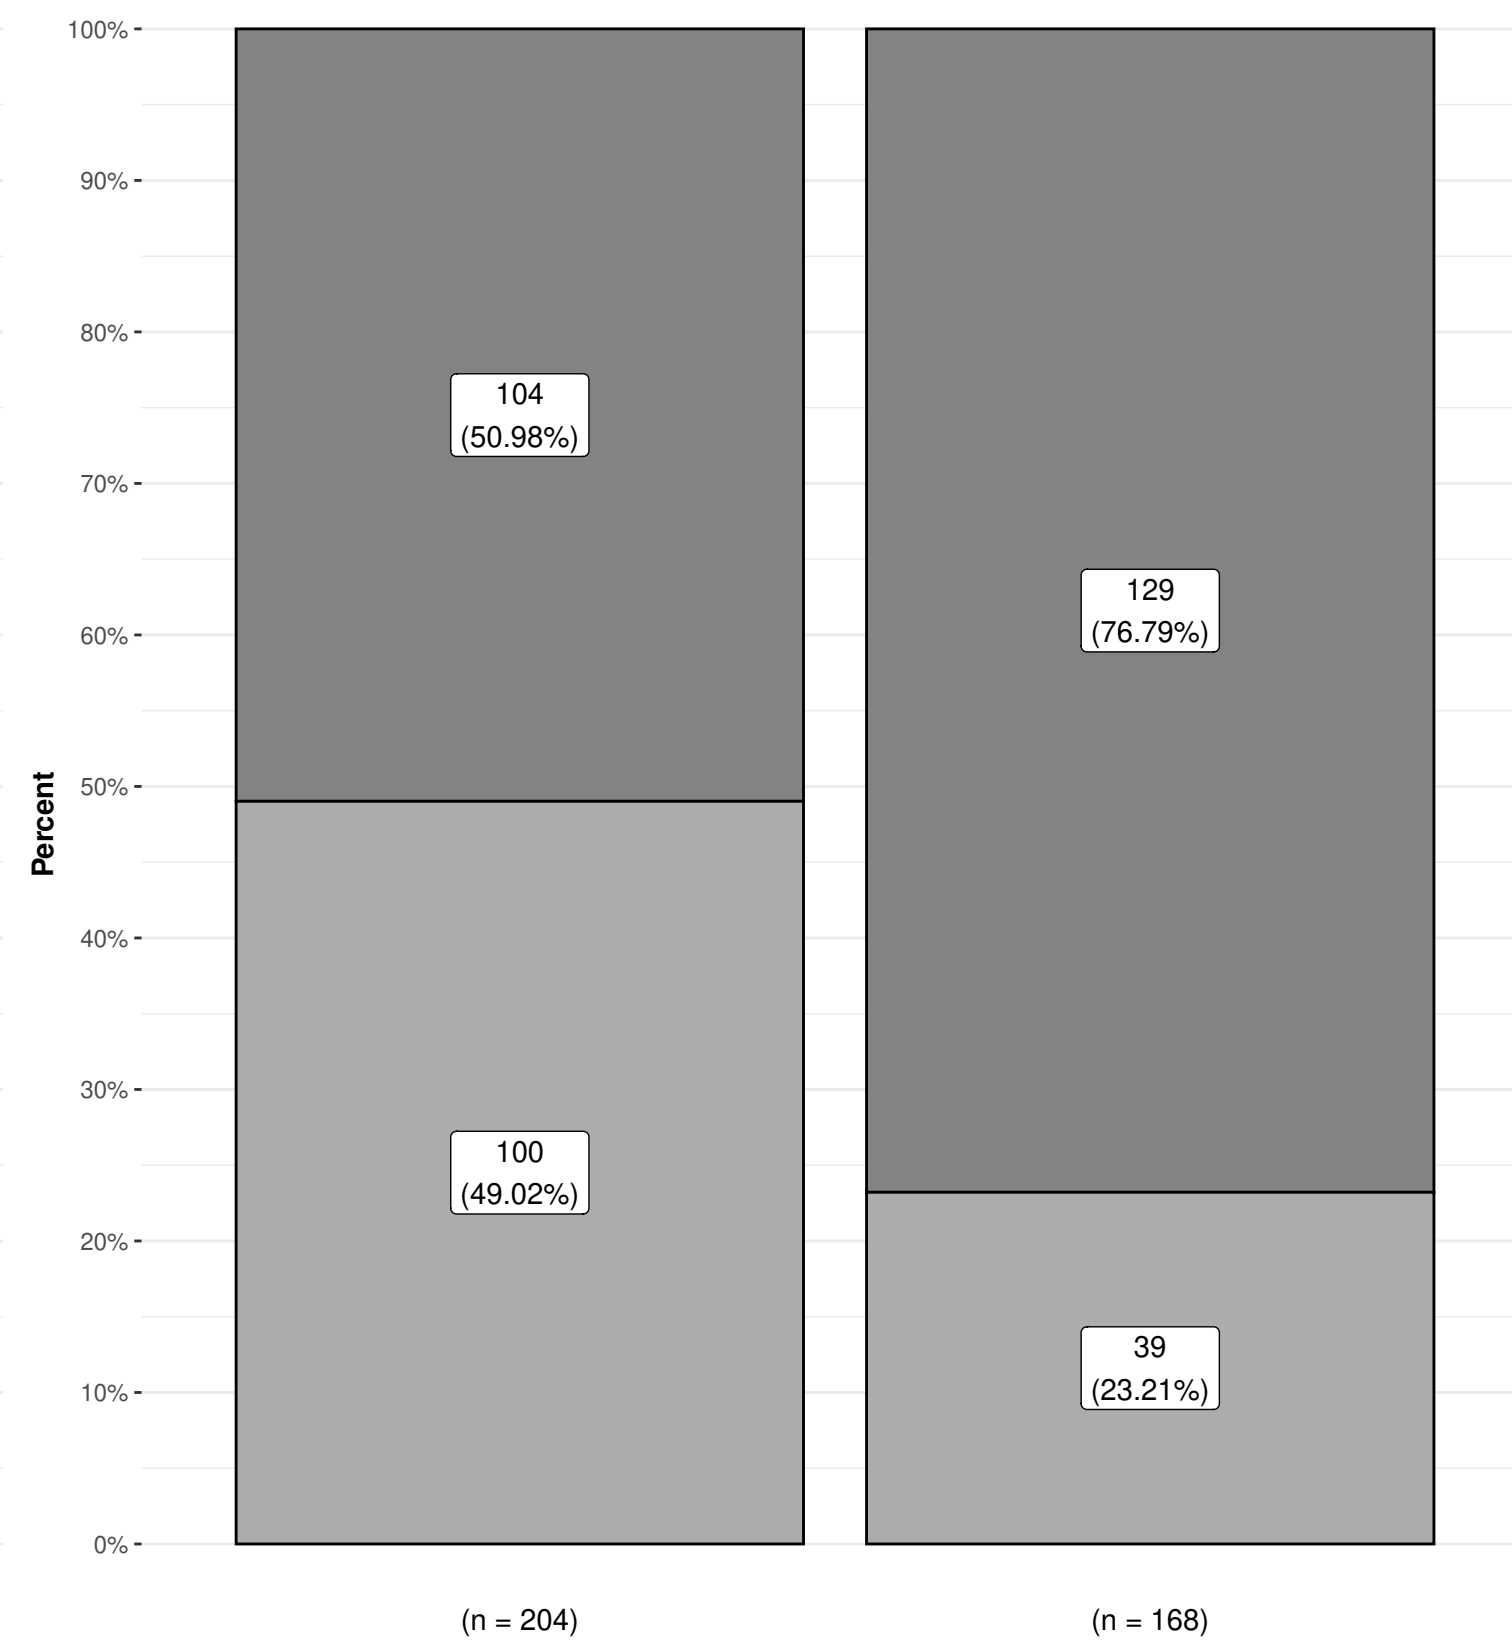

**Medical Provider Assessment of Nonsuicidal Self-Injury**

**Medical Provider Assessment of Suicide Ideation**

**Medical Provider Assessment of Suicide Attempts**
